# Supplementary material for: Preparation of neuroprotective condensed 1,4-benzoxazepines by regio- and diastereoselective domino Knoevenagel–[1,5]-hydride shift cyclization reaction
Source: PubMed Central journal article supplement (PMC4273254; doi:10.3762/bjoc.10.272), 2014-11-06
Supplement: Beilstein_J_Org_Chem-10-2594-s001.pdf [file Beilstein_J_Org_Chem-10-2594-s001.pdf]

**Supporting Information**  
**for**  
**Preparation of neuroprotective condensed 1,4-benzoxazepines by regio- and**  
**diastereoselective domino Knoevenagel–[1,5]-hydride shift cyclization**  
**reaction**

László Tóth<sup>1,2</sup>, Yan Fu<sup>3</sup>, Hai Yan Zhang<sup>3</sup>, Attila Mándi<sup>2</sup>, Katalin E. Kövér<sup>4</sup>, Tünde-Zita  
Illyés<sup>2</sup>, Attila Kiss-Szikszai<sup>2</sup>, Balázs Balogh<sup>1</sup>, Tibor Kurtán<sup>2,5</sup>, Sándor Antus<sup>\*2</sup>, and Péter  
Mátyus<sup>\*1</sup>

Address: <sup>1</sup>Department of Organic Chemistry, Semmelweis University, Högyes u. 7., 1092  
Budapest, Hungary, Fax: +36 1 217-0851, <sup>2</sup>Department of Organic Chemistry, University of  
Debrecen, Debrecen, P. O. Box 20, 4010 Debrecen, Hungary, <sup>3</sup>CAS Key Laboratory of  
Receptor Research, Shanghai Institute of Materia Medica, Chinese Academy of Sciences, 555  
Zu Chong Zhi Road, Zhang Jiang Hi-Tech Park, Shanghai 201203, PR China, <sup>4</sup>Department of  
Inorganic and Analytical Chemistry, University of Debrecen, H-4010 Debrecen, Hungary and  
<sup>5</sup>Porfirin Ltd., Mikszáth K. u. 7. III/3, 4032 Debrecen, Hungary

Email: Sándor Antus - [antus.sandor@science.unideb.hu](mailto:antus.sandor@science.unideb.hu); Péter Mátyus -  
[peter.matyus@szerves.sote.hu](mailto:peter.matyus@szerves.sote.hu)

\*Corresponding author

**Spectroscopic data and details of calculations**

## Table of Contents

|                                                                                                                                                                            |     |
|----------------------------------------------------------------------------------------------------------------------------------------------------------------------------|-----|
| Figure S1. Computed structures and population of low-energy conformers of <i>trans</i> -(2 <i>S</i> ,15 <i>aS</i> )- <b>7b</b> .....                                       | 3   |
| Figure S2 Computed structures and population of low-energy conformers of <i>cis</i> -(2 <i>R</i> ,15 <i>aS</i> )- <b>7b</b> .....                                          | S3  |
| Table S1 Cartesian coordinates of the low-energy DFT-optimized MMFF conformers of <i>trans</i> -(2 <i>S</i> ,15 <i>aS</i> )- <b>7d</b> , model compound of <b>7a</b> ..... | S4  |
| Table S2 Cartesian coordinates of the low-energy DFT-optimized MMFF conformers of <i>trans</i> -(2 <i>S</i> ,15 <i>aS</i> )- <b>7b</b> .....                               | S5  |
| Table S3 Cartesian coordinates of the low-energy DFT-optimized MMFF conformers of <i>cis</i> -(2 <i>R</i> ,15 <i>aS</i> )- <b>7d</b> .....                                 | S7  |
| Table S4 Cartesian coordinates of the low-energy DFT-optimized MMFF conformers of <i>cis</i> -(2 <i>R</i> ,15 <i>aS</i> )- <b>7b</b> .....                                 | S8  |
| Figure S3. <sup>1</sup> H-NMR spectra of ( <i>rac</i> )- <b>9</b> .....                                                                                                    | S10 |
| Figure S4. <sup>13</sup> C-NMR spectra of ( <i>rac</i> )- <b>9</b> .....                                                                                                   | S11 |
| Figure S5. IR spectra of ( <i>rac</i> )- <b>9</b> recorded as KBr disc.....                                                                                                | S12 |
| Figure S6. <sup>1</sup> H-NMR spectra of ( <i>rac</i> )- <b>10</b> .....                                                                                                   | S13 |
| Figure S7. <sup>13</sup> C-NMR spectra of ( <i>rac</i> )- <b>10</b> .....                                                                                                  | S14 |
| Figure S8. IR spectra of ( <i>rac</i> )- <b>10</b> recorded as KBr disc.....                                                                                               | S15 |
| Figure S9. <sup>1</sup> H-NMR spectra of ( <i>rac</i> )- <b>5</b> .....                                                                                                    | S16 |
| Figure S10. <sup>13</sup> C-NMR spectra of ( <i>rac</i> )- <b>5</b> .....                                                                                                  | S17 |
| Figure S11. IR spectra of ( <i>rac</i> )- <b>5</b> recorded as KBr disc.....                                                                                               | S18 |
| Figure S12. <sup>1</sup> H-NMR spectra of ( <i>rac</i> )- <b>7a</b> .....                                                                                                  | S19 |
| Figure S13. <sup>13</sup> C-NMR spectra of ( <i>rac</i> )- <b>7a</b> .....                                                                                                 | S20 |
| Figure S14. IR spectra of ( <i>rac</i> )- <b>7a</b> recorded as KBr disc.....                                                                                              | S21 |
| Figure S15. <sup>1</sup> H-NMR spectra of ( <i>rac</i> )- <b>7b</b> .....                                                                                                  | S22 |
| Figure S16. <sup>13</sup> C-NMR spectra of ( <i>rac</i> )- <b>7b</b> .....                                                                                                 | S23 |
| Figure S17. IR spectra of ( <i>rac</i> )- <b>7b</b> recorded as KBr disc.....                                                                                              | S24 |
| Figure S18. <sup>1</sup> H-NMR spectra of ( <i>rac</i> )- <b>7c</b> .....                                                                                                  | S25 |
| Figure S19. <sup>13</sup> C-NMR spectra of ( <i>rac</i> )- <b>7c</b> .....                                                                                                 | S26 |
| Figure S20. IR spectra of ( <i>rac</i> )- <b>7c</b> recorded as KBr disc.....                                                                                              | S27 |

## Figures

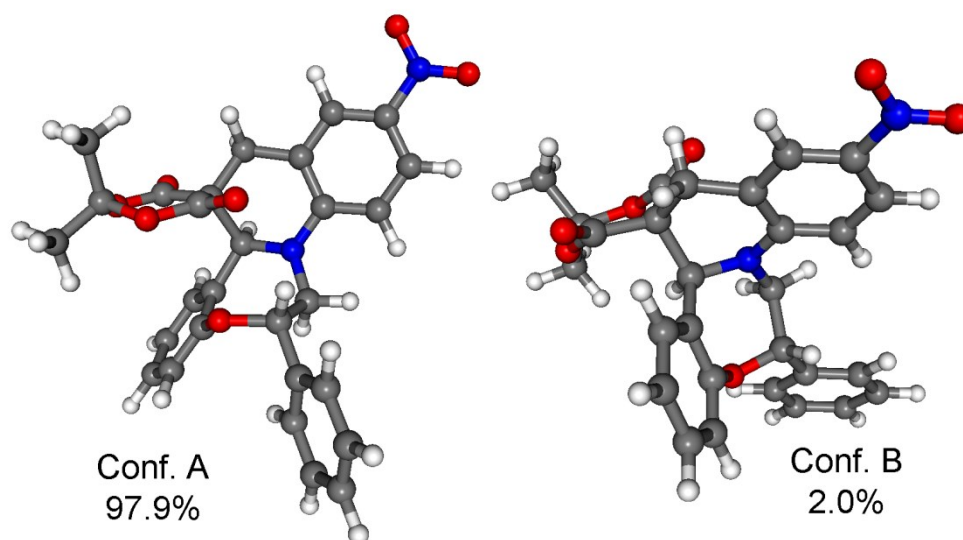

**Figure S1.** Low-energy conformers (> 1%) of *trans*-(2*S*,15*aS*)-**7b** optimized at B3LYP/6-31G(d) *in vacuo*. Boltzmann-weights for the same conformers in the B3LYP/TZVP PCM/CHCl<sub>3</sub> calculations are 95.8% and 3.6%, respectively.

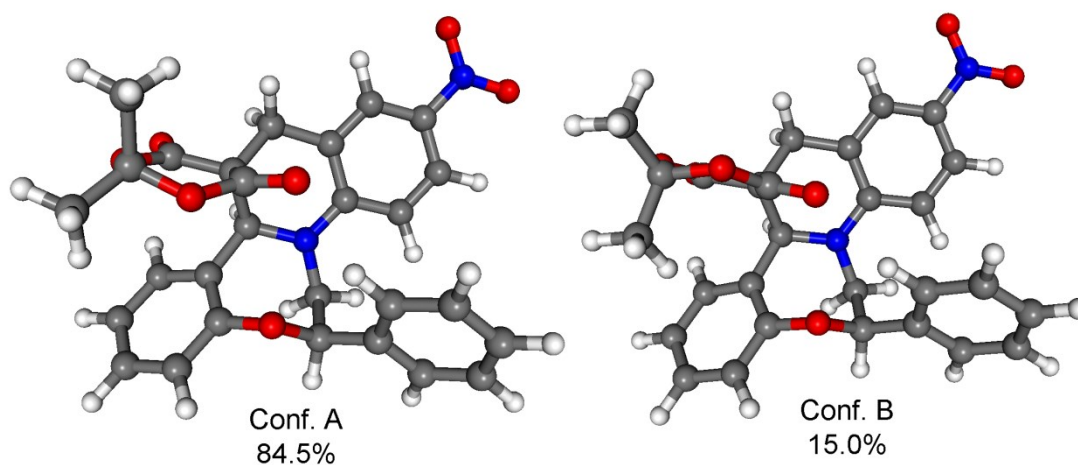

**Figure S2.** Low-energy conformers (> 1%) of *cis*-(2*R*,15*aS*)-**7b** optimized at B3LYP/6-31G(d) *in vacuo*. Boltzmann-weights for the same conformers in the B3LYP/TZVP PCM/CHCl<sub>3</sub> calculations are 82.5% and 14.1%, respectively.

## Tables

**Table S1.** Cartesian coordinates of the low-energy DFT-optimized MMFF conformers of *trans*-(2*S*,15*aS*)-**7d**, model compound of **7a**, calculated at B3LYP/6-31G(d) level of theory *in vacuo*.

| Conformer A |      | Standard Orientation<br>(Ångstroms) |           |           |
|-------------|------|-------------------------------------|-----------|-----------|
| I           | Atom | X                                   | Y         | Z         |
| 1           | C    | 1.877613                            | -1.936478 | -2.305506 |
| 2           | C    | 3.235946                            | -2.181183 | -2.508297 |
| 3           | C    | 4.177468                            | -1.600925 | -1.657664 |
| 4           | C    | 3.759724                            | -0.764479 | -0.623027 |
| 5           | H    | 1.143020                            | -2.405060 | -2.954347 |
| 6           | H    | 3.553140                            | -2.825092 | -3.323043 |
| 7           | H    | 5.237380                            | -1.791301 | -1.801270 |
| 8           | H    | 4.469357                            | -0.293244 | 0.049089  |
| 9           | C    | 0.480525                            | 1.478316  | -0.872731 |
| 10          | C    | 1.327253                            | 1.512783  | 0.409322  |
| 11          | O    | 2.025182                            | 0.256440  | 0.643615  |
| 12          | C    | 2.398599                            | -0.518403 | -0.427019 |
| 13          | C    | 1.433017                            | -1.119212 | -1.257204 |
| 14          | H    | 1.124309                            | 1.405059  | -1.755443 |
| 15          | H    | -0.022859                           | 2.440012  | -0.941635 |
| 16          | C    | -0.057932                           | -0.972252 | -1.016289 |
| 17          | N    | -0.509407                           | 0.407565  | -0.890426 |
| 18          | N    | 0.768155                            | -3.880898 | 0.702833  |
| 19          | C    | -0.173601                           | -3.309465 | -0.132108 |
| 20          | C    | -0.617175                           | -1.880054 | 0.186767  |
| 21          | C    | -0.177653                           | -1.369035 | 1.553308  |
| 22          | N    | 0.779257                            | -2.119065 | 2.226588  |
| 23          | C    | 1.306858                            | -3.351488 | 1.873538  |
| 24          | O    | -0.591066                           | -3.912411 | -1.105896 |
| 25          | O    | -0.642488                           | -0.365368 | 2.061528  |
| 26          | O    | 2.143386                            | -3.933207 | 2.531312  |
| 27          | C    | -2.694114                           | -0.418384 | -0.219461 |
| 28          | C    | -1.864011                           | 0.639208  | -0.676231 |
| 29          | C    | -2.454841                           | 1.902893  | -0.916865 |
| 30          | C    | -3.805418                           | 2.121260  | -0.711439 |
| 31          | C    | -4.601938                           | 1.069722  | -0.258516 |
| 32          | C    | -4.049376                           | -0.184009 | -0.013695 |
| 33          | H    | -1.860667                           | 2.723597  | -1.299312 |
| 34          | H    | -4.253481                           | 3.087472  | -0.907277 |
| 35          | H    | -4.693249                           | -0.975443 | 0.353601  |
| 36          | C    | 4.013443                            | 4.902816  | 0.480949  |
| 37          | C    | 4.141167                            | 3.938756  | -0.521639 |
| 38          | C    | 3.282838                            | 2.839883  | -0.552646 |
| 39          | C    | 2.286805                            | 2.685723  | 0.423944  |
| 40          | C    | 2.170983                            | 3.656616  | 1.426211  |
| 41          | C    | 3.025241                            | 4.759783  | 1.455442  |
| 42          | H    | 4.681854                            | 5.759240  | 0.502314  |
| 43          | H    | 4.909888                            | 4.043293  | -1.282680 |
| 44          | H    | 3.400203                            | 2.095161  | -1.334881 |
| 45          | H    | 1.406765                            | 3.544937  | 2.191941  |
| 46          | H    | 2.921075                            | 5.502968  | 2.241289  |
| 47          | H    | 1.125089                            | -1.728068 | 3.095999  |
| 48          | H    | 1.107413                            | -4.801060 | 0.444215  |
| 49          | H    | -0.561443                           | -1.419700 | -1.882054 |
| 50          | H    | 0.648432                            | 1.584035  | 1.262028  |
| 51          | C    | -2.158123                           | -1.803690 | 0.063265  |
| 52          | H    | -2.435673                           | -2.487314 | -0.746521 |
| 53          | H    | -2.621269                           | -2.191827 | 0.977657  |
| 54          | N    | -6.025064                           | 1.284735  | -0.035933 |
| 55          | O    | -6.476350                           | 2.414775  | -0.243315 |
| 56          | O    | -6.702371                           | 0.326492  | 0.347060  |

B3LYP Energy = -1673.11036861 a.u.; E+ZPVE = -1672.678981 a.u.

**Table S2.** Cartesian coordinates of the low-energy DFT-optimized MMFF conformers of *trans*-(2*S*,15*aS*)-**7b** calculated at B3LYP/6-31G(d) level of theory *in vacuo*.

| Conformer A |      | Standard Orientation<br>(Ångstroms) |           |           |
|-------------|------|-------------------------------------|-----------|-----------|
| I           | Atom | X                                   | Y         | Z         |
| 1           | C    | 1.862775                            | -1.540671 | -2.568441 |
| 2           | C    | 3.219378                            | -1.768063 | -2.799962 |
| 3           | C    | 4.165682                            | -1.277079 | -1.900194 |
| 4           | C    | 3.754151                            | -0.545010 | -0.786498 |
| 5           | H    | 1.125110                            | -1.944372 | -3.255784 |
| 6           | H    | 3.530925                            | -2.331419 | -3.674284 |
| 7           | H    | 5.224698                            | -1.454088 | -2.066988 |
| 8           | H    | 4.467397                            | -0.139263 | -0.076333 |
| 9           | C    | 0.478179                            | 1.721045  | -0.803473 |
| 10          | C    | 1.335412                            | 1.628281  | 0.469349  |
| 11          | O    | 2.028958                            | 0.355685  | 0.577292  |
| 12          | C    | 2.394138                            | -0.315300 | -0.561691 |
| 13          | C    | 1.424298                            | -0.829877 | -1.442968 |
| 14          | H    | 1.116020                            | 1.732887  | -1.693451 |
| 15          | H    | -0.023265                           | 2.685722  | -0.774382 |
| 16          | C    | -0.065831                           | -0.702777 | -1.184444 |
| 17          | N    | -0.514425                           | 0.658864  | -0.921206 |
| 18          | O    | 0.752749                            | -3.760632 | 0.209153  |
| 19          | C    | -0.167480                           | -3.108433 | -0.536256 |
| 20          | C    | -0.630136                           | -1.725943 | -0.076365 |
| 21          | C    | -0.193217                           | -1.340478 | 1.329520  |
| 22          | O    | 0.776636                            | -2.095538 | 1.914958  |
| 23          | C    | 0.917228                            | -3.485905 | 1.612233  |
| 24          | O    | -0.530690                           | -3.584557 | -1.586141 |
| 25          | O    | -0.641466                           | -0.385853 | 1.915251  |
| 26          | C    | -0.127151                           | -4.281266 | 2.392822  |
| 27          | C    | -2.703371                           | -0.228966 | -0.351787 |
| 28          | C    | -1.868173                           | 0.869635  | -0.689238 |
| 29          | C    | -2.456712                           | 2.153209  | -0.795551 |
| 30          | C    | -3.808508                           | 2.350464  | -0.578431 |
| 31          | C    | -4.610208                           | 1.257941  | -0.247887 |
| 32          | C    | -4.059785                           | -0.015471 | -0.133344 |
| 33          | H    | -1.859149                           | 3.009799  | -1.081682 |
| 34          | H    | -4.253732                           | 3.333110  | -0.672528 |
| 35          | H    | -4.707225                           | -0.840349 | 0.142909  |
| 36          | C    | 4.034258                            | 4.991408  | 0.824432  |
| 37          | C    | 3.048694                            | 4.767843  | 1.786449  |
| 38          | C    | 2.190519                            | 3.673904  | 1.665365  |
| 39          | C    | 2.299598                            | 2.792802  | 0.582636  |
| 40          | C    | 3.293086                            | 3.027556  | -0.380356 |
| 41          | C    | 4.155489                            | 4.116762  | -0.257742 |
| 42          | H    | 4.705668                            | 5.840747  | 0.917299  |
| 43          | H    | 2.949786                            | 5.440503  | 2.634130  |
| 44          | H    | 1.429200                            | 3.497613  | 2.421754  |
| 45          | H    | 3.405404                            | 2.352798  | -1.224326 |
| 46          | H    | 4.922293                            | 4.283959  | -1.009551 |
| 47          | H    | -0.572403                           | -1.059938 | -2.088792 |
| 48          | H    | 0.666325                            | 1.622755  | 1.332511  |
| 49          | C    | 2.350591                            | -3.855588 | 1.949989  |
| 50          | H    | -0.003558                           | -4.106276 | 3.464952  |
| 51          | H    | -1.139990                           | -3.975699 | 2.107635  |
| 52          | H    | -0.017505                           | -5.349248 | 2.185733  |
| 53          | H    | 2.540484                            | -3.669016 | 3.010200  |
| 54          | H    | 2.523766                            | -4.912718 | 1.732069  |
| 55          | H    | 3.033968                            | -3.247932 | 1.351623  |
| 56          | C    | -2.170077                           | -1.637351 | -0.206621 |
| 57          | H    | -2.442870                           | -2.234610 | -1.083437 |
| 58          | H    | -2.644581                           | -2.113833 | 0.659482  |
| 59          | N    | -6.034488                           | 1.449919  | -0.016742 |
| 60          | O    | -6.715789                           | 0.457709  | 0.258524  |
| 61          | O    | -6.484317                           | 2.595855  | -0.109336 |

B3LYP Energy = -1717.41808982 a.u.; E+ZPVE = -1716.938660 a.u.

| Conformer B |      | Standard Orientation<br>(Ångstroms) |           |           |
|-------------|------|-------------------------------------|-----------|-----------|
| I           | Atom | X                                   | Y         | Z         |
| 1           | C    | 0.757476                            | 0.793089  | 2.760935  |
| 2           | C    | 0.425583                            | 0.503770  | 4.087268  |
| 3           | C    | -0.851806                           | 0.052817  | 4.410191  |
| 4           | C    | -1.797304                           | -0.119031 | 3.399154  |
| 5           | H    | 1.746886                            | 1.175265  | 2.551161  |
| 6           | H    | 1.172009                            | 0.640591  | 4.864118  |
| 7           | H    | -1.114280                           | -0.168369 | 5.440918  |
| 8           | H    | -2.803176                           | -0.467368 | 3.611985  |
| 9           | C    | -1.401047                           | -0.684533 | -0.965442 |
| 10          | C    | -2.305412                           | -1.105728 | 0.212170  |
| 11          | O    | -2.443810                           | 0.011287  | 1.116996  |
| 12          | C    | -1.458360                           | 0.161173  | 2.077599  |
| 13          | C    | -0.175800                           | 0.636207  | 1.730268  |
| 14          | H    | -1.870449                           | 0.178127  | -1.454064 |
| 15          | H    | -1.347786                           | -1.477944 | -1.713867 |
| 16          | C    | 0.042862                            | 0.923994  | 0.240297  |
| 17          | N    | -0.056985                           | -0.301507 | -0.563403 |
| 18          | O    | 0.219604                            | 2.973619  | -1.943994 |
| 19          | C    | 1.133246                            | 1.985128  | -1.699330 |
| 20          | C    | 1.357443                            | 1.667674  | -0.209439 |
| 21          | C    | 1.505270                            | 2.990960  | 0.550428  |
| 22          | O    | 0.585062                            | 3.941346  | 0.219248  |
| 23          | C    | 0.196027                            | 4.171929  | -1.148160 |
| 24          | O    | 1.624260                            | 1.372513  | -2.607651 |
| 25          | O    | 2.298186                            | 3.197942  | 1.431937  |
| 26          | C    | 1.177823                            | 5.169329  | -1.758821 |
| 27          | C    | 2.308420                            | -0.710478 | -0.256833 |
| 28          | C    | 1.002536                            | -1.199039 | -0.525384 |
| 29          | C    | 0.828689                            | -2.579917 | -0.772764 |
| 30          | C    | 1.902187                            | -3.455043 | -0.749358 |
| 31          | C    | 3.174126                            | -2.959804 | -0.467340 |
| 32          | C    | 3.373546                            | -1.601184 | -0.226828 |
| 33          | H    | -0.158307                           | -2.980606 | -0.968691 |
| 34          | H    | 1.767931                            | -4.514179 | -0.930899 |
| 35          | H    | 4.380076                            | -1.247944 | -0.031385 |
| 36          | C    | -6.179652                           | -2.291693 | -1.279362 |
| 37          | C    | -5.935884                           | -0.955266 | -0.956526 |
| 38          | C    | -4.692207                           | -0.567260 | -0.457544 |
| 39          | C    | -3.679201                           | -1.515713 | -0.269498 |
| 40          | C    | -3.932549                           | -2.855026 | -0.589485 |
| 41          | C    | -5.174344                           | -3.242150 | -1.094213 |
| 42          | H    | -7.149392                           | -2.591754 | -1.666917 |
| 43          | H    | -6.717310                           | -0.211993 | -1.090854 |
| 44          | H    | -4.508615                           | 0.468367  | -0.190010 |
| 45          | H    | -3.157553                           | -3.603151 | -0.434048 |
| 46          | H    | -5.358177                           | -4.286050 | -1.333346 |
| 47          | H    | -0.798632                           | 1.546116  | -0.074599 |
| 48          | H    | -1.835297                           | -1.937794 | 0.751706  |
| 49          | C    | -1.240657                           | 4.661582  | -1.121482 |
| 50          | H    | 1.173482                            | 6.098424  | -1.182654 |
| 51          | H    | 2.193476                            | 4.759878  | -1.750871 |
| 52          | H    | 0.897844                            | 5.382037  | -2.794036 |
| 53          | H    | -1.306645                           | 5.583822  | -0.538419 |
| 54          | H    | -1.584012                           | 4.855919  | -2.140978 |
| 55          | H    | -1.887456                           | 3.907558  | -0.664991 |
| 56          | C    | 2.589346                            | 0.763748  | -0.041711 |
| 57          | H    | 3.353967                            | 1.085422  | -0.756788 |
| 58          | H    | 3.015822                            | 0.925553  | 0.950943  |
| 59          | N    | 4.309780                            | -3.870845 | -0.425512 |
| 60          | O    | 5.419553                            | -3.400530 | -0.159366 |
| 61          | O    | 4.100130                            | -5.065009 | -0.657637 |

B3LYP Energy = -1717.41427030 a.u.; E+ZPVE = -1716.934998 a.u.

**Table S3.** Cartesian coordinates of the low-energy DFT-optimized MMFF conformers of *cis*-(2*R*,15*S*)-**7d**, model compound of **7a**, calculated at B3LYP/6-31G(d) level of theory *in vacuo*.

| Conformer A |      | Standard Orientation<br>(Ångstroms) |           |           |
|-------------|------|-------------------------------------|-----------|-----------|
| I           | Atom | X                                   | Y         | Z         |
| 1           | C    | 3.432189                            | -0.394337 | -1.833627 |
| 2           | C    | 4.661339                            | 0.264956  | -1.850140 |
| 3           | C    | 4.807022                            | 1.479960  | -1.180527 |
| 4           | C    | 3.714154                            | 2.040514  | -0.520622 |
| 5           | H    | 3.325285                            | -1.341882 | -2.354280 |
| 6           | H    | 5.498532                            | -0.170025 | -2.387906 |
| 7           | H    | 5.761177                            | 1.999042  | -1.184324 |
| 8           | H    | 3.787144                            | 2.995291  | -0.009181 |
| 9           | C    | -0.029739                           | 1.445198  | -1.740367 |
| 10          | C    | 0.438735                            | 2.529093  | -0.730447 |
| 11          | O    | 1.430934                            | 1.971681  | 0.153553  |
| 12          | C    | 2.487493                            | 1.375508  | -0.503802 |
| 13          | C    | 2.330419                            | 0.129866  | -1.141009 |
| 14          | H    | 0.702930                            | 1.372879  | -2.550493 |
| 15          | H    | -0.961173                           | 1.759573  | -2.208635 |
| 16          | C    | 1.042491                            | -0.685694 | -1.081320 |
| 17          | N    | -0.175006                           | 0.128939  | -1.132634 |
| 18          | N    | 3.261636                            | -2.442646 | 0.910401  |
| 19          | C    | 2.237828                            | -2.602761 | -0.003966 |
| 20          | C    | 1.007671                            | -1.699032 | 0.151337  |
| 21          | C    | 0.950112                            | -0.959918 | 1.486619  |
| 22          | N    | 2.146851                            | -0.843808 | 2.186603  |
| 23          | C    | 3.317621                            | -1.562482 | 1.989084  |
| 24          | O    | 2.336428                            | -3.407936 | -0.913200 |
| 25          | O    | -0.069864                           | -0.474744 | 1.934236  |
| 26          | O    | 4.292849                            | -1.459481 | 2.701292  |
| 27          | C    | -1.493714                           | -1.767195 | -0.367216 |
| 28          | C    | -1.414222                           | -0.444502 | -0.878893 |
| 29          | C    | -2.623597                           | 0.262455  | -1.087565 |
| 30          | C    | -3.854393                           | -0.328792 | -0.863436 |
| 31          | C    | -3.908531                           | -1.643146 | -0.401937 |
| 32          | C    | -2.735205                           | -2.345164 | -0.137641 |
| 33          | H    | -2.612422                           | 1.299497  | -1.394226 |
| 34          | H    | -4.773723                           | 0.218240  | -1.031556 |
| 35          | H    | -2.805909                           | -3.352526 | 0.257262  |
| 36          | C    | -2.804765                           | 4.284800  | 1.515385  |
| 37          | C    | -2.116870                           | 3.189053  | 2.038637  |
| 38          | C    | -1.056706                           | 2.613545  | 1.335596  |
| 39          | C    | -0.672455                           | 3.137868  | 0.096422  |
| 40          | C    | -1.359643                           | 4.245109  | -0.419951 |
| 41          | C    | -2.423709                           | 4.813100  | 0.280525  |
| 42          | H    | -3.629878                           | 4.727120  | 2.067089  |
| 43          | H    | -2.408040                           | 2.772285  | 2.999022  |
| 44          | H    | -0.534722                           | 1.757572  | 1.745818  |
| 45          | H    | -1.055928                           | 4.672877  | -1.373894 |
| 46          | H    | -2.945016                           | 5.672728  | -0.132111 |
| 47          | H    | 2.119084                            | -0.282533 | 3.031336  |
| 48          | H    | 4.095891                            | -2.999576 | 0.759745  |
| 49          | H    | 1.058759                            | -1.368187 | -1.943981 |
| 50          | H    | 0.909640                            | 3.328796  | -1.322968 |
| 51          | C    | -0.255318                           | -2.568014 | -0.045262 |
| 52          | H    | -0.024241                           | -3.272719 | -0.851246 |
| 53          | H    | -0.432078                           | -3.166952 | 0.855324  |
| 54          | N    | -5.195788                           | -2.277205 | -0.166964 |
| 55          | O    | -5.201677                           | -3.440338 | 0.248579  |
| 56          | O    | -6.214723                           | -1.618983 | -0.397947 |

B3LYP Energy = -1673.10783505 a.u.; E+ZPVE = -1672.676362 a.u.

**Table S4.** Cartesian coordinates of the low-energy DFT-optimized MMFF conformers of *cis*-(2*R*,15*aS*)-**7b** calculated at B3LYP/6-31G(d) level of theory *in vacuo*.

| Conformer A |      | Standard Orientation<br>(Ångstroms) |           |           |
|-------------|------|-------------------------------------|-----------|-----------|
| I           | Atom | X                                   | Y         | Z         |
| 1           | C    | 3.285862                            | 0.226919  | -2.018875 |
| 2           | C    | 4.445873                            | 1.000718  | -1.981320 |
| 3           | C    | 4.483387                            | 2.157981  | -1.203328 |
| 4           | C    | 3.350284                            | 2.546246  | -0.489105 |
| 5           | H    | 3.266522                            | -0.676217 | -2.621474 |
| 6           | H    | 5.312725                            | 0.698285  | -2.561204 |
| 7           | H    | 5.381704                            | 2.767990  | -1.166660 |
| 8           | H    | 3.336498                            | 3.453474  | 0.106981  |
| 9           | C    | -0.350026                           | 1.692372  | -1.711284 |
| 10          | C    | 0.030357                            | 2.722566  | -0.612707 |
| 11          | O    | 1.100147                            | 2.198945  | 0.193643  |
| 12          | C    | 2.193293                            | 1.766647  | -0.526212 |
| 13          | C    | 2.148137                            | 0.574383  | -1.274941 |
| 14          | H    | 0.368209                            | 1.767408  | -2.533863 |
| 15          | H    | -1.319930                           | 1.946187  | -2.137750 |
| 16          | C    | 0.948167                            | -0.369824 | -1.284931 |
| 17          | N    | -0.344653                           | 0.320089  | -1.222743 |
| 18          | O    | 3.389284                            | -2.159082 | 0.374937  |
| 19          | C    | 2.348874                            | -2.270291 | -0.475866 |
| 20          | C    | 1.051079                            | -1.510338 | -0.172383 |
| 21          | C    | 0.999429                            | -0.907983 | 1.225607  |
| 22          | O    | 2.200913                            | -0.696158 | 1.838202  |
| 23          | C    | 3.252342                            | -1.656610 | 1.719842  |
| 24          | O    | 2.483090                            | -2.908810 | -1.493629 |
| 25          | O    | -0.016714                           | -0.549176 | 1.761561  |
| 26          | C    | 4.544319                            | -0.924379 | 2.034748  |
| 27          | C    | -1.456812                           | -1.748825 | -0.585682 |
| 28          | C    | -1.514050                           | -0.380414 | -0.962391 |
| 29          | C    | -2.786699                           | 0.238256  | -1.031564 |
| 30          | C    | -3.950065                           | -0.474796 | -0.802453 |
| 31          | C    | -3.871183                           | -1.827803 | -0.474865 |
| 32          | C    | -2.631225                           | -2.449577 | -0.347773 |
| 33          | H    | -2.875248                           | 1.298704  | -1.224305 |
| 34          | H    | -4.918343                           | 0.006539  | -0.861377 |
| 35          | H    | -2.597452                           | -3.492772 | -0.054019 |
| 36          | C    | -3.313094                           | 3.859951  | 1.870793  |
| 37          | C    | -2.437961                           | 2.863474  | 2.304900  |
| 38          | C    | -1.342578                           | 2.489410  | 1.523813  |
| 39          | C    | -1.113959                           | 3.118150  | 0.295051  |
| 40          | C    | -1.988478                           | 4.127287  | -0.131568 |
| 41          | C    | -3.085935                           | 4.493545  | 0.647330  |
| 42          | H    | -4.164582                           | 4.145073  | 2.482846  |
| 43          | H    | -2.607945                           | 2.367104  | 3.256471  |
| 44          | H    | -0.671847                           | 1.710067  | 1.865010  |
| 45          | H    | -1.806868                           | 4.636550  | -1.076709 |
| 46          | H    | -3.754395                           | 5.278874  | 0.304499  |
| 47          | H    | 1.005452                            | -0.947444 | -2.218871 |
| 48          | H    | 0.391688                            | 3.622652  | -1.134808 |
| 49          | C    | 2.965769                            | -2.838247 | 2.643078  |
| 50          | H    | 5.390976                            | -1.610585 | 1.949325  |
| 51          | H    | 4.504229                            | -0.526299 | 3.052115  |
| 52          | H    | 4.677363                            | -0.098894 | 1.331149  |
| 53          | H    | 2.882796                            | -2.491741 | 3.676715  |
| 54          | H    | 2.025016                            | -3.326096 | 2.365031  |
| 55          | H    | 3.771449                            | -3.573941 | 2.571620  |
| 56          | C    | -0.139195                           | -2.464528 | -0.419935 |
| 57          | H    | 0.106076                            | -3.044677 | -1.315820 |
| 58          | H    | -0.215132                           | -3.180691 | 0.406658  |
| 59          | N    | -5.085883                           | -2.588258 | -0.233483 |
| 60          | O    | -4.973410                           | -3.780851 | 0.069026  |
| 61          | O    | -6.167145                           | -2.002129 | -0.345722 |

B3LYP Energy = -1717.41661743 a.u.; E+ZPVE = -1716.937000 a.u.



| Conformer B |      | Standard Orientation<br>(Ångstroms) |           |           |
|-------------|------|-------------------------------------|-----------|-----------|
| I           | Atom | X                                   | Y         | Z         |
| 1           | C    | 3.336209                            | 0.721719  | -1.817511 |
| 2           | C    | 4.404360                            | 1.605039  | -1.663468 |
| 3           | C    | 4.274075                            | 2.713407  | -0.826282 |
| 4           | C    | 3.063813                            | 2.943242  | -0.175033 |
| 5           | H    | 3.446173                            | -0.137249 | -2.471755 |
| 6           | H    | 5.330655                            | 1.426728  | -2.201573 |
| 7           | H    | 5.099802                            | 3.407490  | -0.697111 |
| 8           | H    | 2.915338                            | 3.811009  | 0.460221  |
| 9           | C    | -0.467335                           | 1.768702  | -1.671394 |
| 10          | C    | -0.246593                           | 2.793681  | -0.522075 |
| 11          | O    | 0.823939                            | 2.353221  | 0.327694  |
| 12          | C    | 1.994825                            | 2.056054  | -0.330151 |
| 13          | C    | 2.122593                            | 0.904586  | -1.132907 |
| 14          | H    | 0.273896                            | 1.952278  | -2.455918 |
| 15          | H    | -1.440253                           | 1.934782  | -2.135125 |
| 16          | C    | 1.032759                            | -0.159872 | -1.293846 |
| 17          | N    | -0.333756                           | 0.385156  | -1.239540 |
| 18          | O    | 3.434305                            | -2.369221 | 0.288765  |
| 19          | C    | 2.545609                            | -2.081232 | -0.682406 |
| 20          | C    | 1.228627                            | -1.383992 | -0.316596 |
| 21          | C    | 1.090359                            | -1.025809 | 1.160786  |
| 22          | O    | 2.028190                            | -1.520058 | 2.017980  |
| 23          | C    | 3.366017                            | -1.831617 | 1.624687  |
| 24          | O    | 2.772626                            | -2.447784 | -1.812353 |
| 25          | O    | 0.134251                            | -0.456126 | 1.617464  |
| 26          | C    | 4.228377                            | -0.576691 | 1.699120  |
| 27          | C    | -1.264507                           | -1.795044 | -0.692515 |
| 28          | C    | -1.434240                           | -0.416190 | -0.990612 |
| 29          | C    | -2.753778                           | 0.100829  | -0.999186 |
| 30          | C    | -3.848765                           | -0.710091 | -0.759247 |
| 31          | C    | -3.656198                           | -2.063125 | -0.480862 |
| 32          | C    | -2.368741                           | -2.593434 | -0.431107 |
| 33          | H    | -2.932041                           | 1.156568  | -1.149524 |
| 34          | H    | -4.852664                           | -0.304026 | -0.767635 |
| 35          | H    | -2.242970                           | -3.643359 | -0.191499 |
| 36          | C    | -3.781399                           | 3.536224  | 1.842830  |
| 37          | C    | -2.831872                           | 2.615135  | 2.288004  |
| 38          | C    | -1.677430                           | 2.367948  | 1.542796  |
| 39          | C    | -1.463645                           | 3.050966  | 0.340252  |
| 40          | C    | -2.413171                           | 3.984244  | -0.097156 |
| 41          | C    | -3.570066                           | 4.222191  | 0.645083  |
| 42          | H    | -4.678921                           | 3.722050  | 2.426648  |
| 43          | H    | -2.990503                           | 2.078382  | 3.219447  |
| 44          | H    | -0.947991                           | 1.643274  | 1.884104  |
| 45          | H    | -2.244632                           | 4.535714  | -1.020783 |
| 46          | H    | -4.297477                           | 4.949630  | 0.294610  |
| 47          | H    | 1.191817                            | -0.610146 | -2.283337 |
| 48          | H    | 0.048609                            | 3.741264  | -1.000526 |
| 49          | C    | 3.833300                            | -2.945223 | 2.548189  |
| 50          | H    | 5.256357                            | -0.816373 | 1.413235  |
| 51          | H    | 4.221722                            | -0.189959 | 2.722041  |
| 52          | H    | 3.850399                            | 0.199084  | 1.029032  |
| 53          | H    | 3.804662                            | -2.601256 | 3.585386  |
| 54          | H    | 3.178016                            | -3.813655 | 2.442438  |
| 55          | H    | 4.855657                            | -3.235847 | 2.292748  |
| 56          | C    | 0.107285                            | -2.410629 | -0.675247 |
| 57          | H    | 0.370585                            | -2.811815 | -1.660463 |
| 58          | H    | 0.135779                            | -3.252794 | 0.025912  |
| 59          | N    | -4.798690                           | -2.921076 | -0.219828 |
| 60          | O    | -4.584290                           | -4.110433 | 0.037958  |
| 61          | O    | -5.924983                           | -2.416651 | -0.271244 |

B3LYP Energy = -1717.41520537 a.u.; E+ZPVE = -1716.935371 a.u.

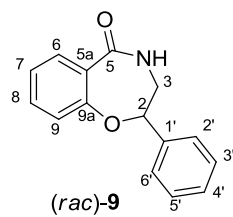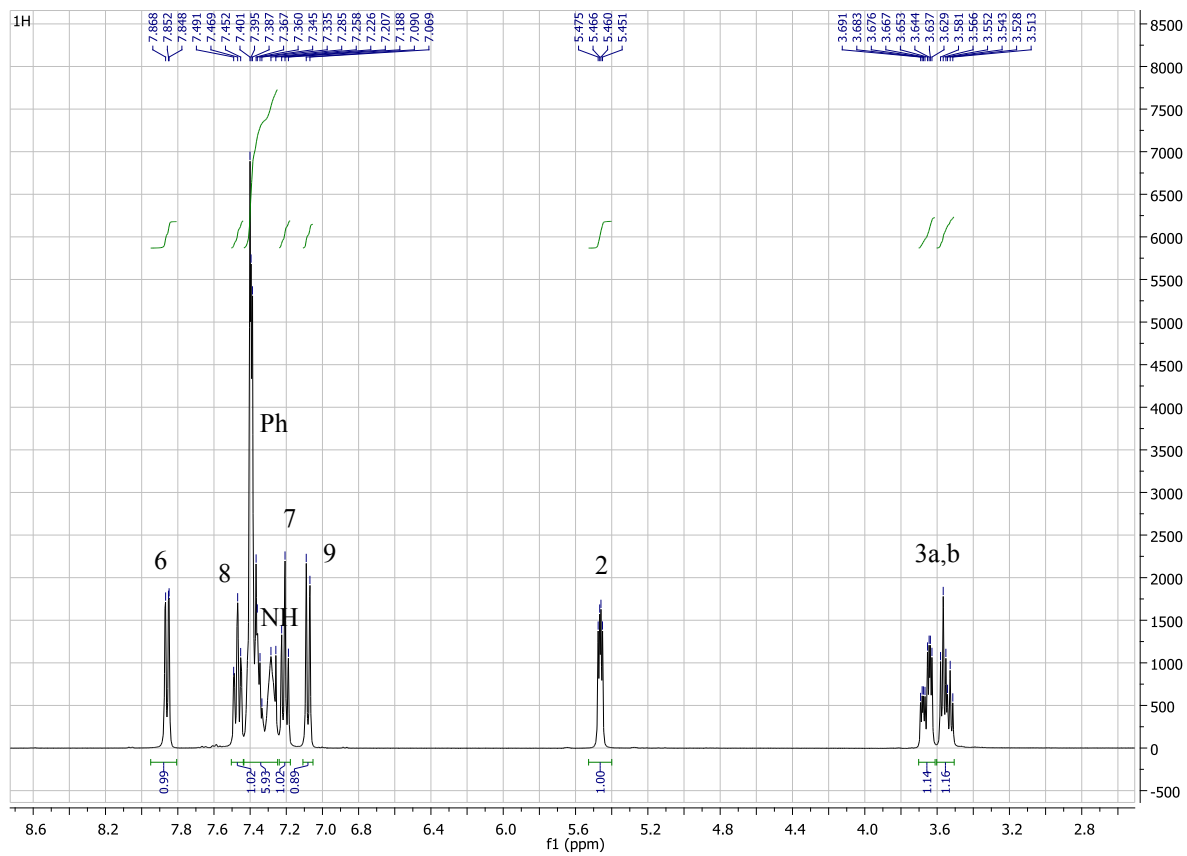

Figure S3.  $^1\text{H-NMR}$  spectra of (*rac*)-9 measured in  $\text{CDCl}_3$  (400 MHz).

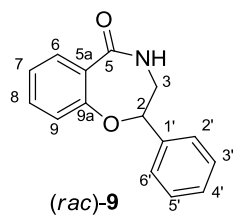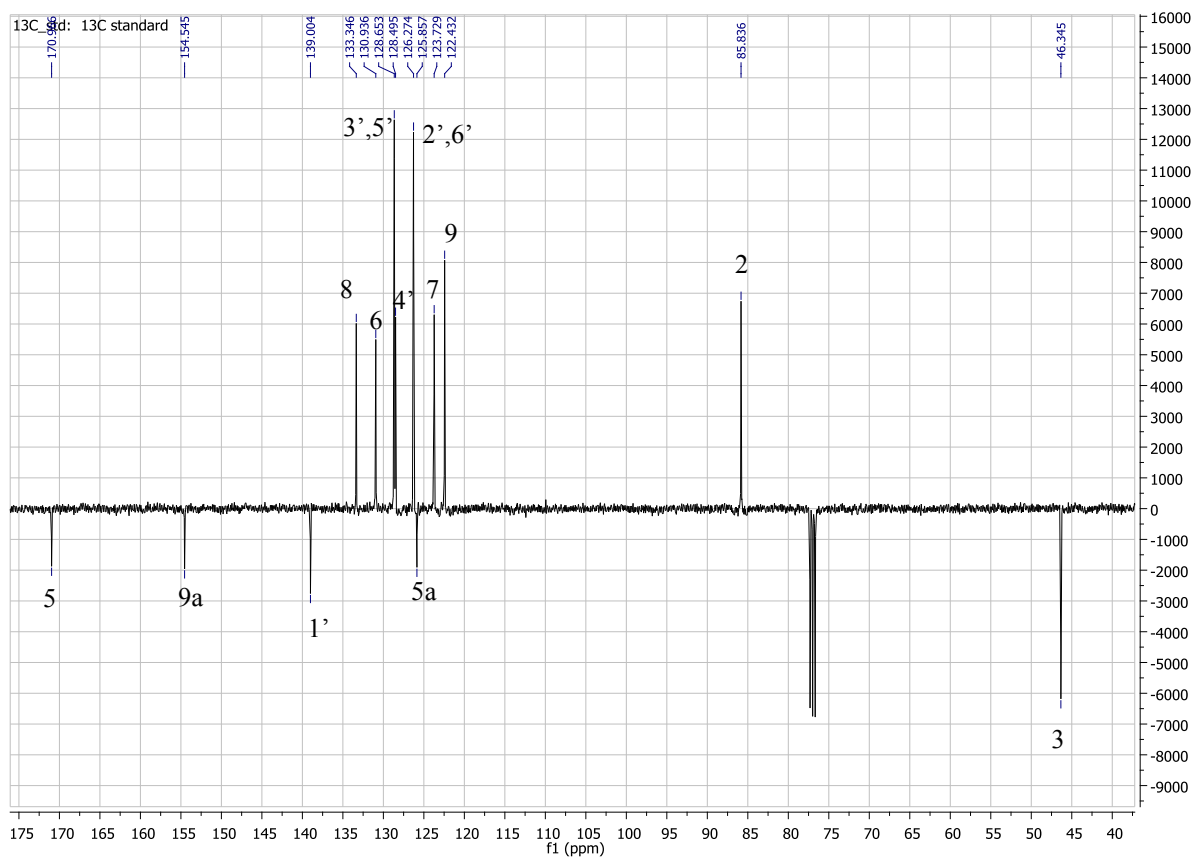

Figure S4.  $^{13}\text{C}$ -NMR spectra of (*rac*)-9 measured in  $\text{CDCl}_3$  (100 MHz).

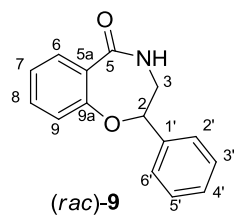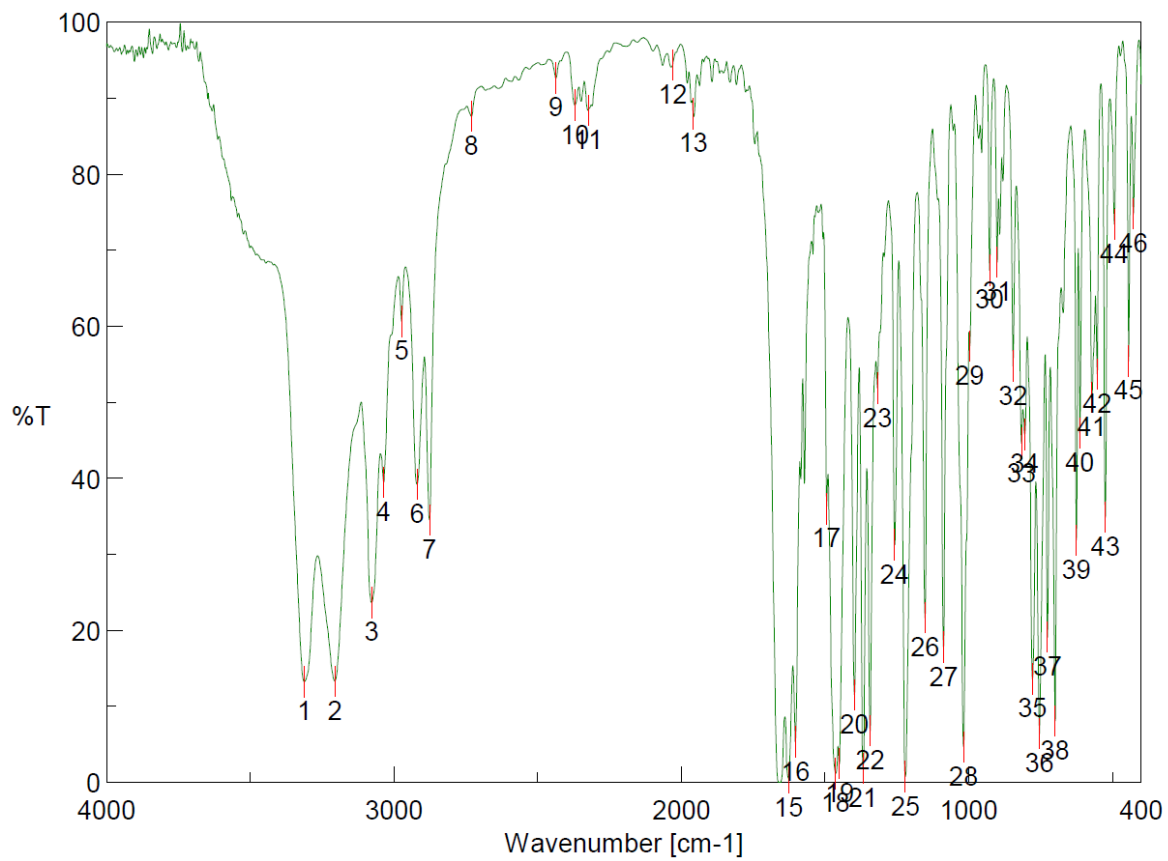

Figure S5. IR spectra of (rac)-9 recorded as KBr disc.

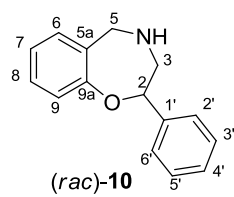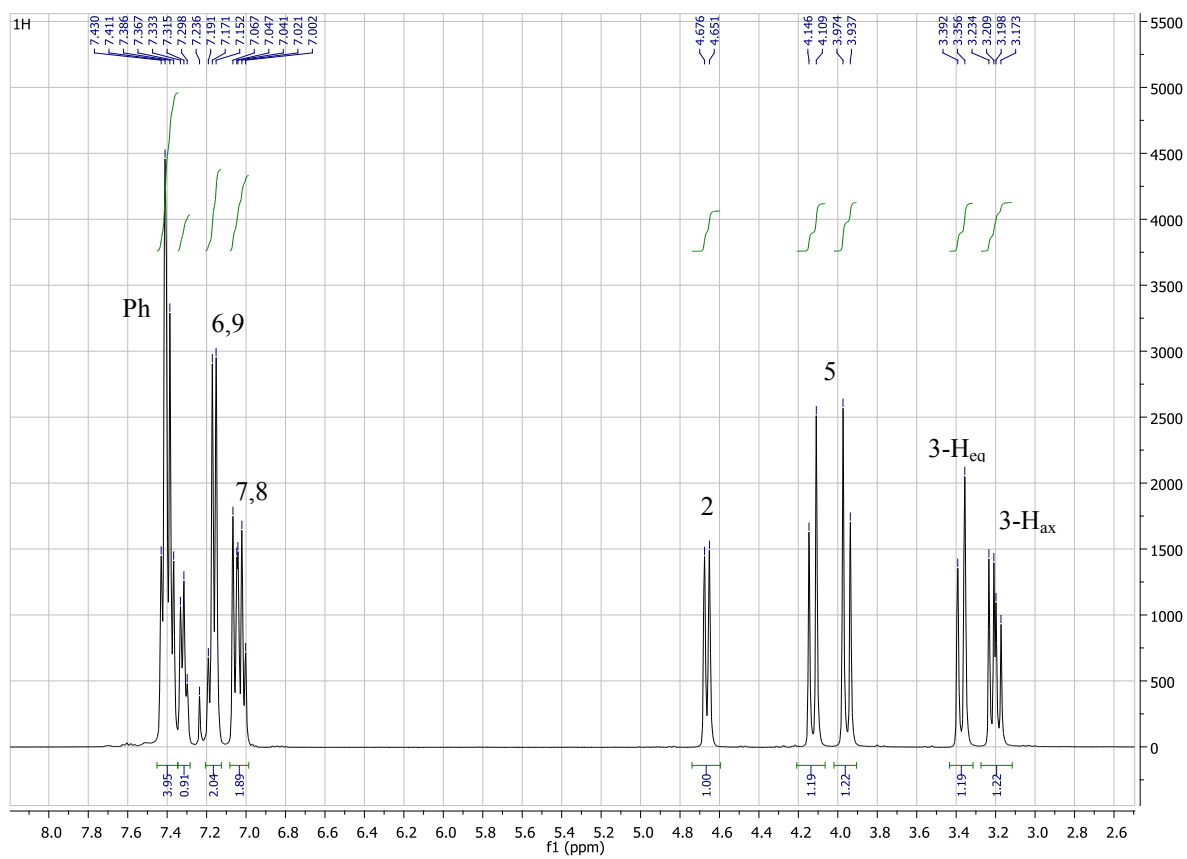

Figure S6. <sup>1</sup>H-NMR spectra of (rac)-10 measured in CDCl<sub>3</sub> (400 MHz).

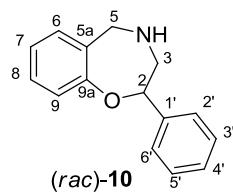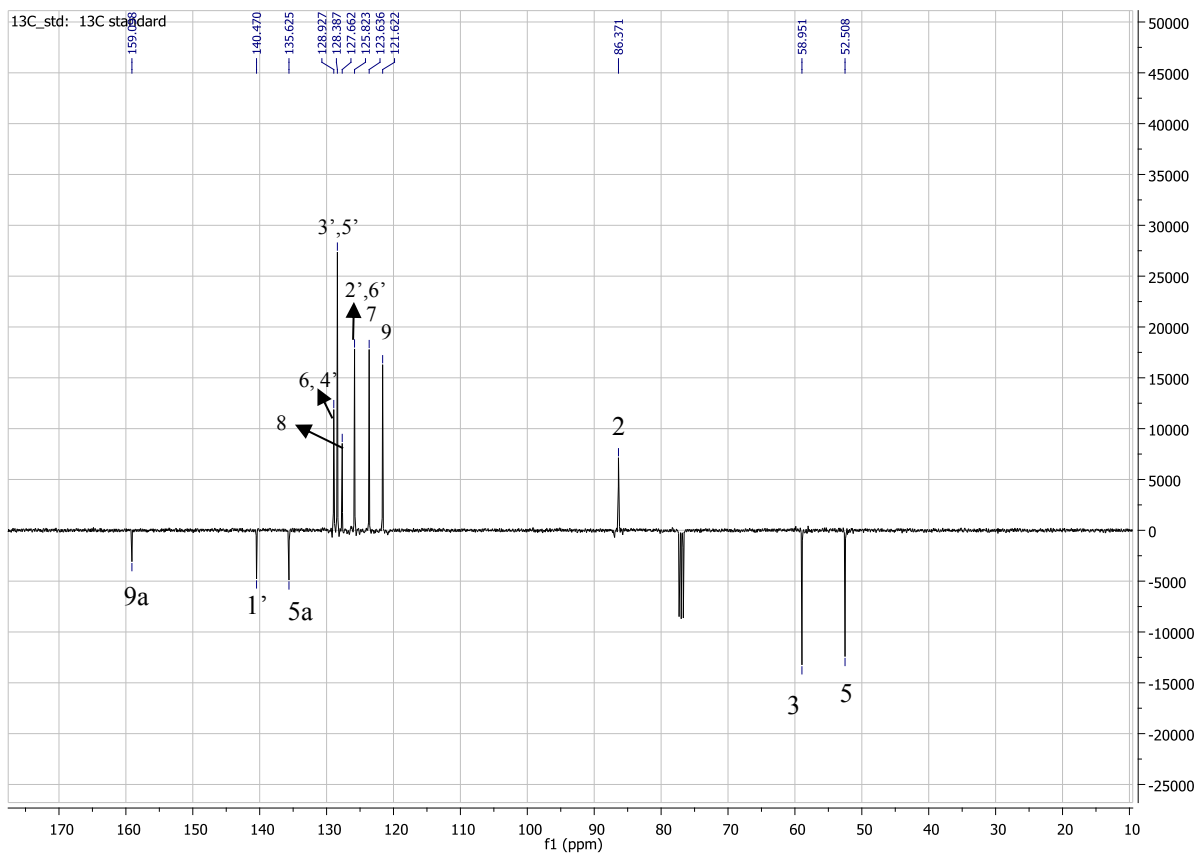

Figure S7.  $^{13}\text{C}$ -NMR spectra of (rac)-10 measured in  $\text{CDCl}_3$  (100 MHz).

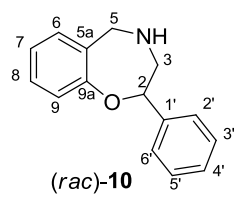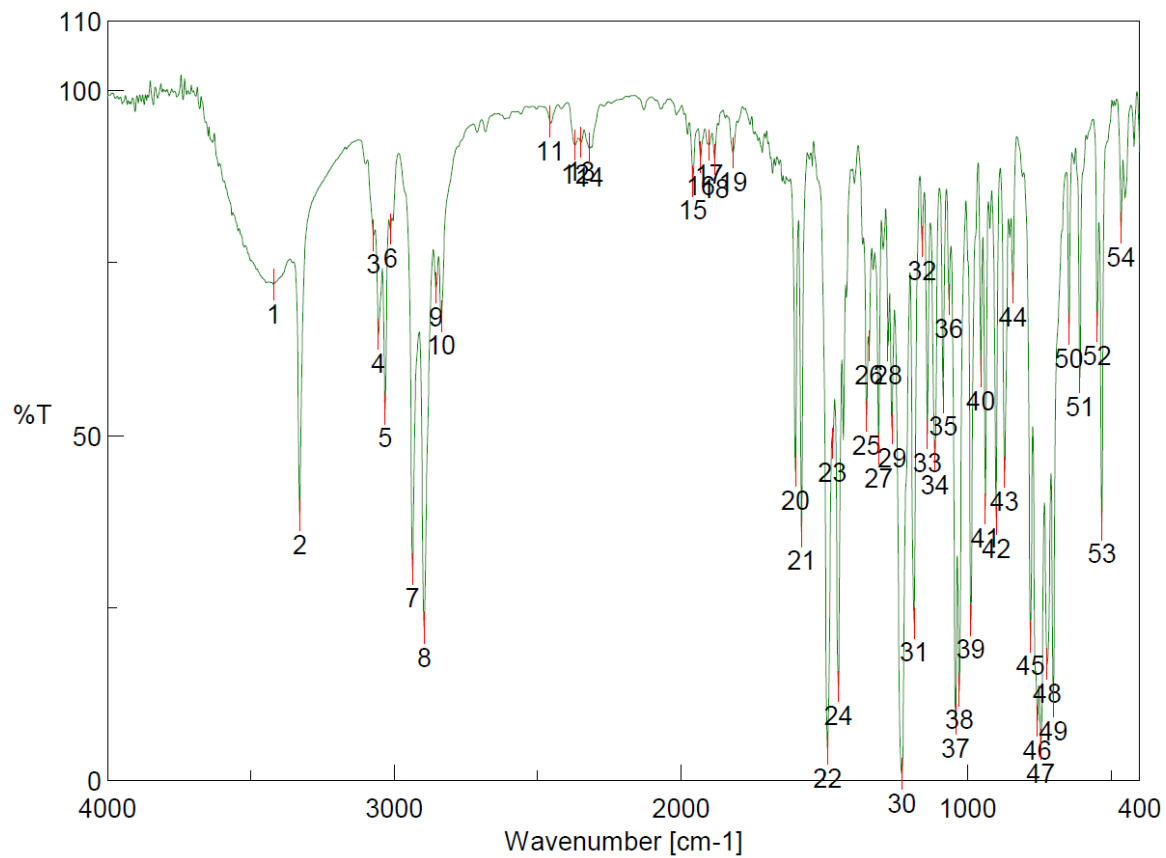

**Figure S8.** IR spectra of (rac)-10 recorded as KBr disc.

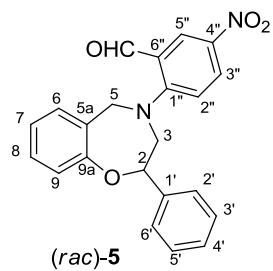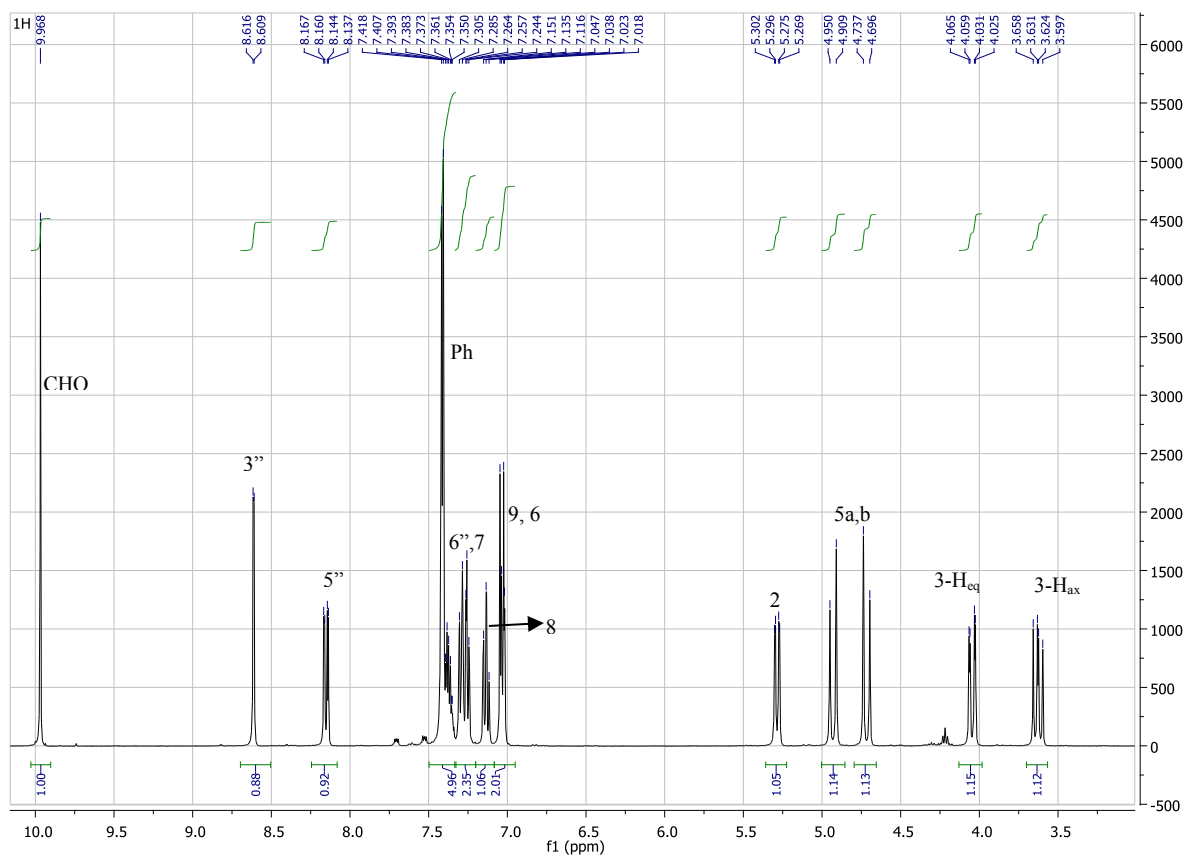

Figure S9. <sup>1</sup>H-NMR spectra of (*rac*)-5 measured in CDCl<sub>3</sub> (400 MHz).



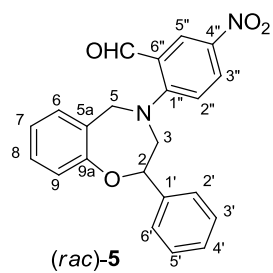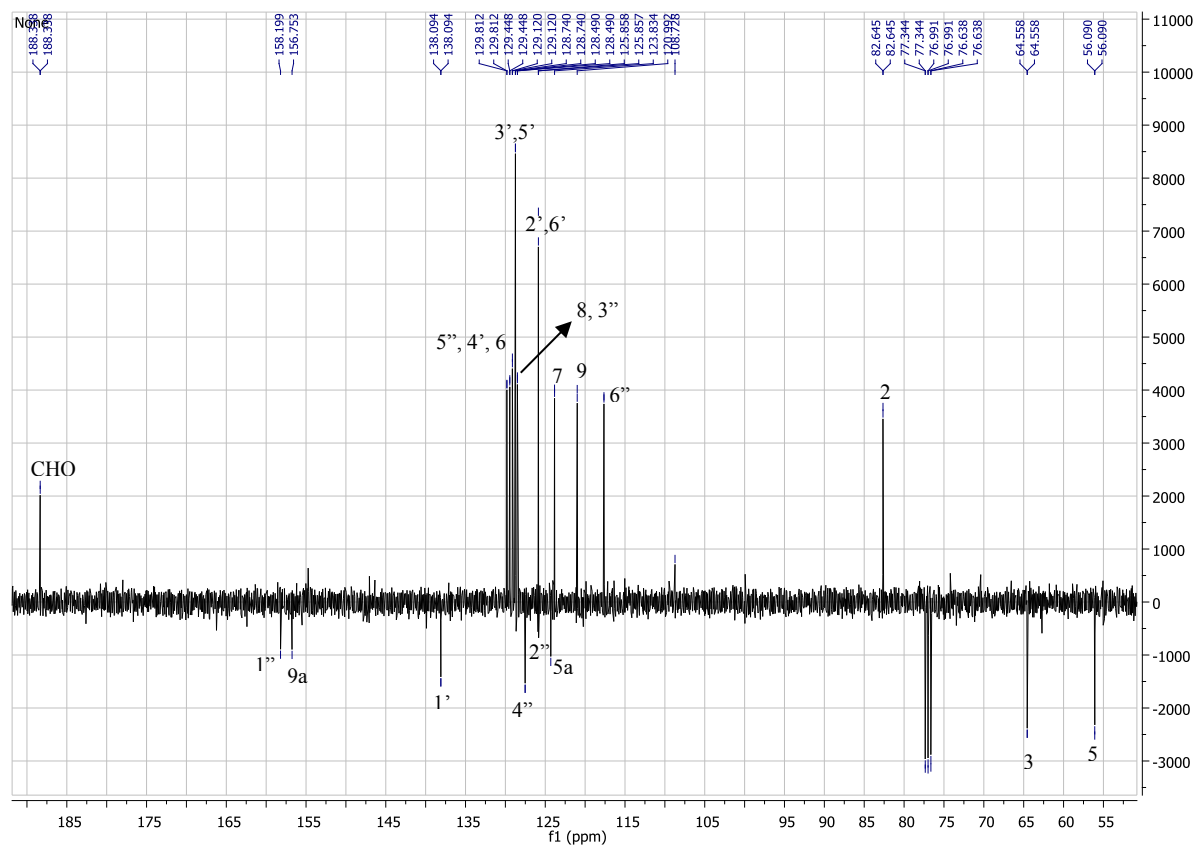

Figure S10. <sup>13</sup>C-NMR spectra of (*rac*)-5 measured in CDCl<sub>3</sub> (100 MHz).

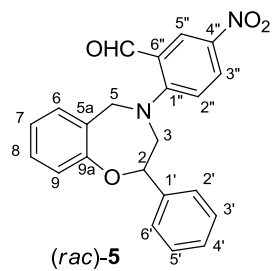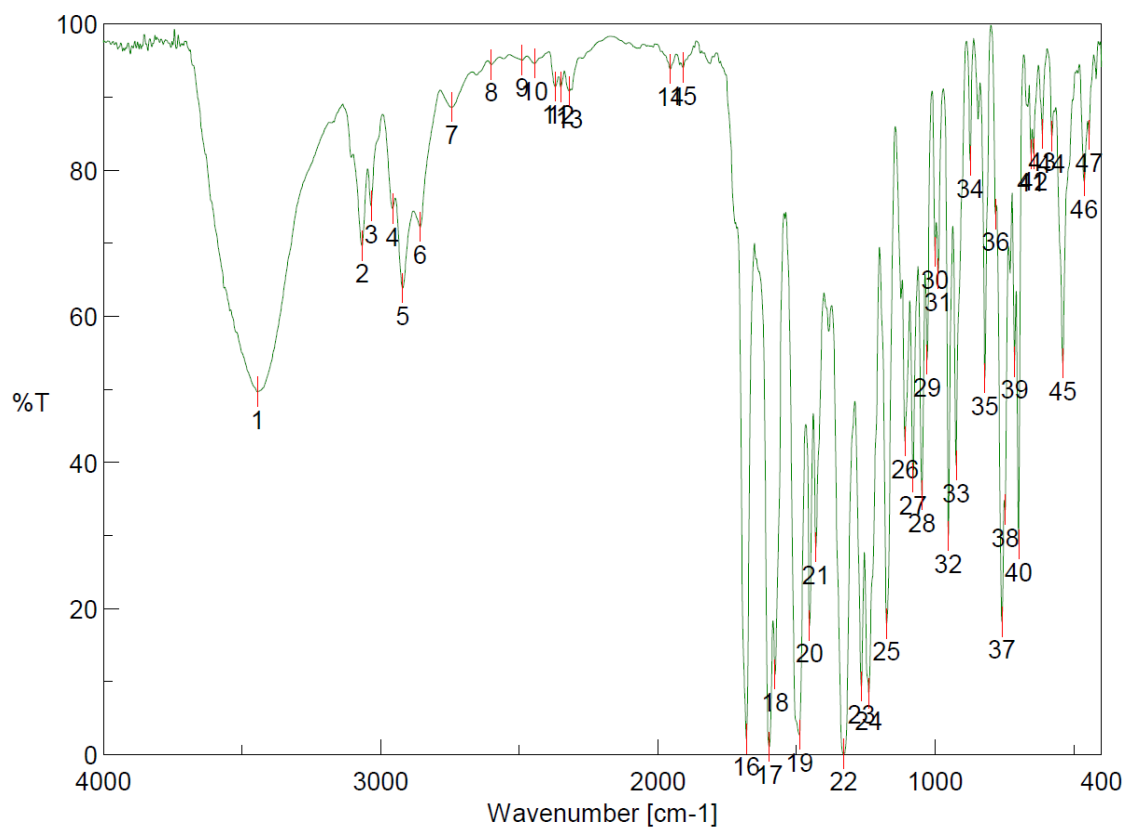

Figure S11. IR spectra of *(rac)*-5 recorded as KBr disc.

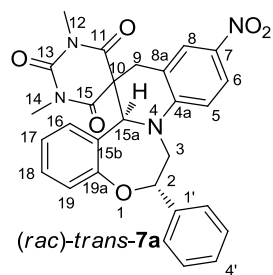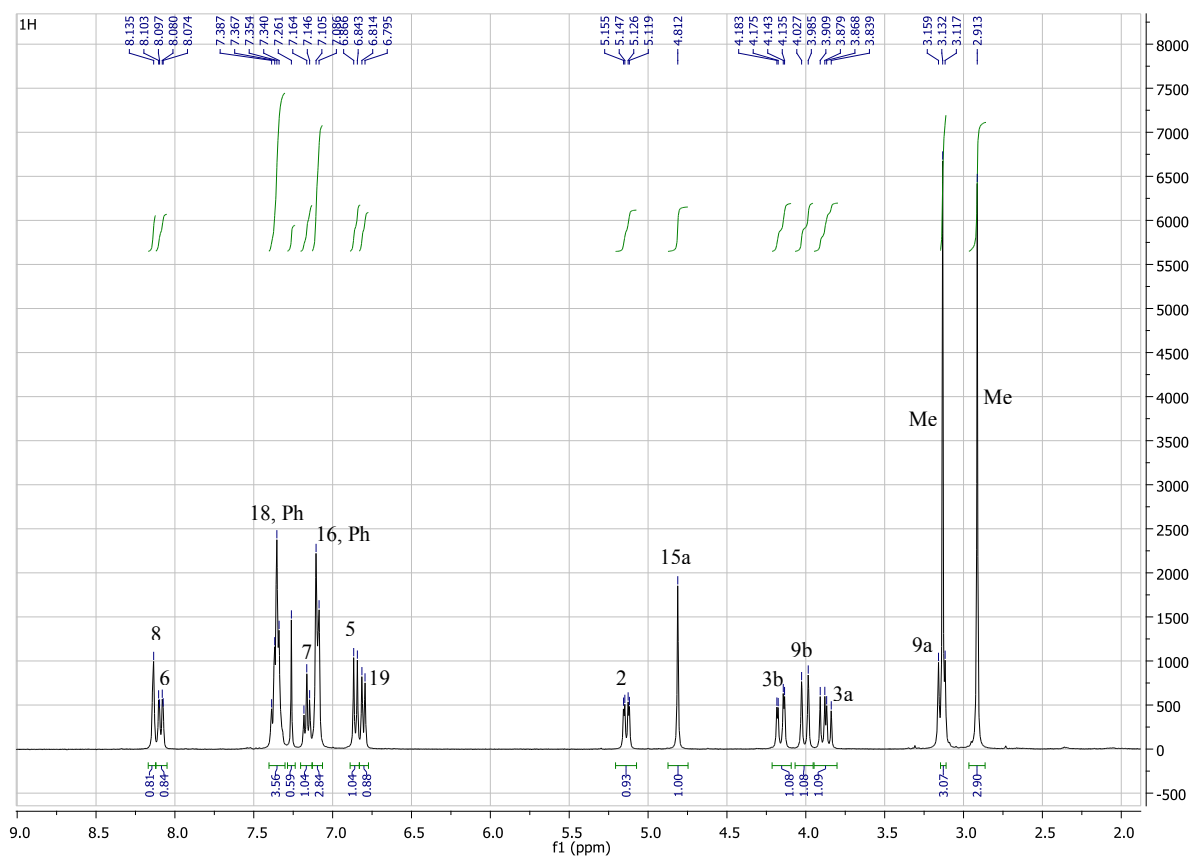

**Figure S12.** <sup>1</sup>H-NMR spectra of (*rac*)-7a measured in CDCl<sub>3</sub> (400 MHz).

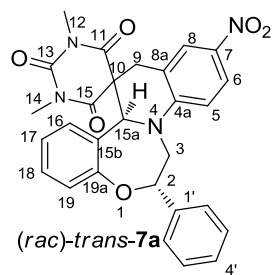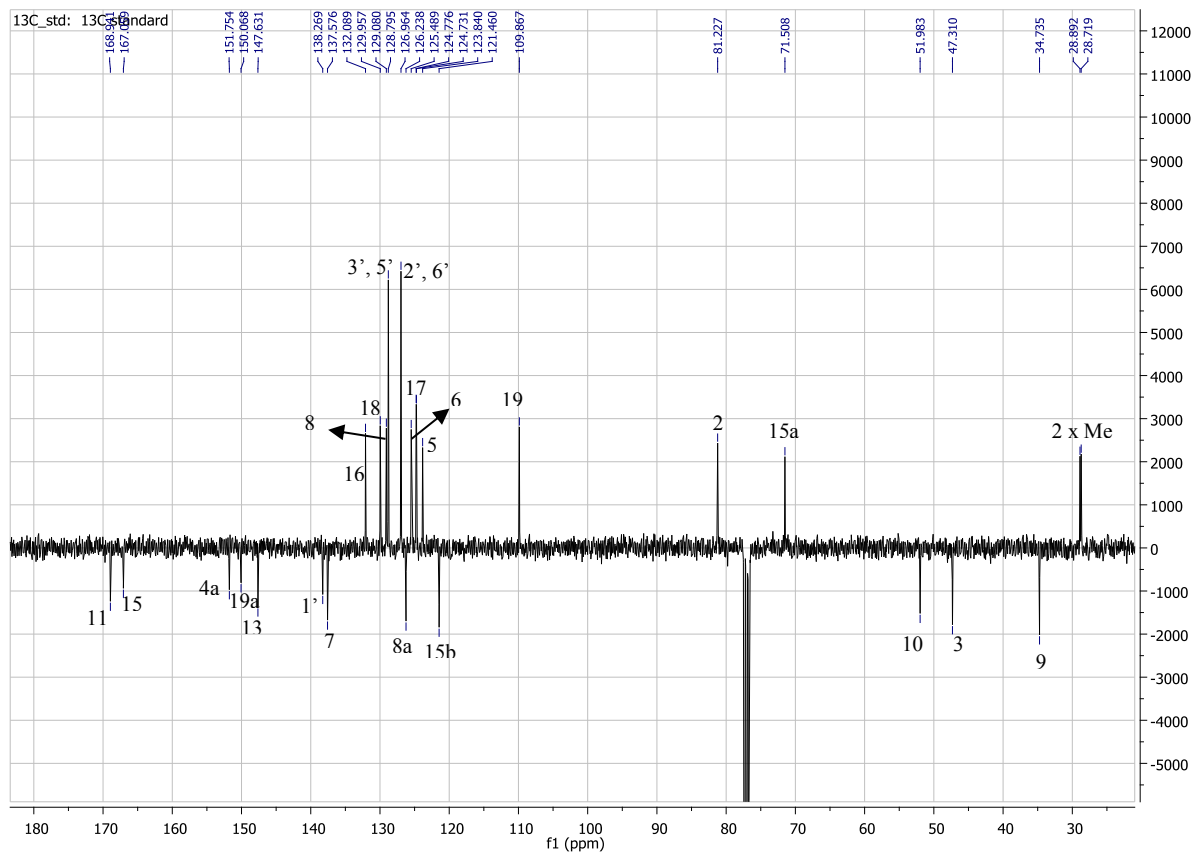

Figure S13.  $^{13}\text{C}$ -NMR spectra of (*rac*)-7a measured in  $\text{CDCl}_3$  (100 MHz).

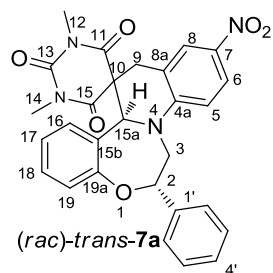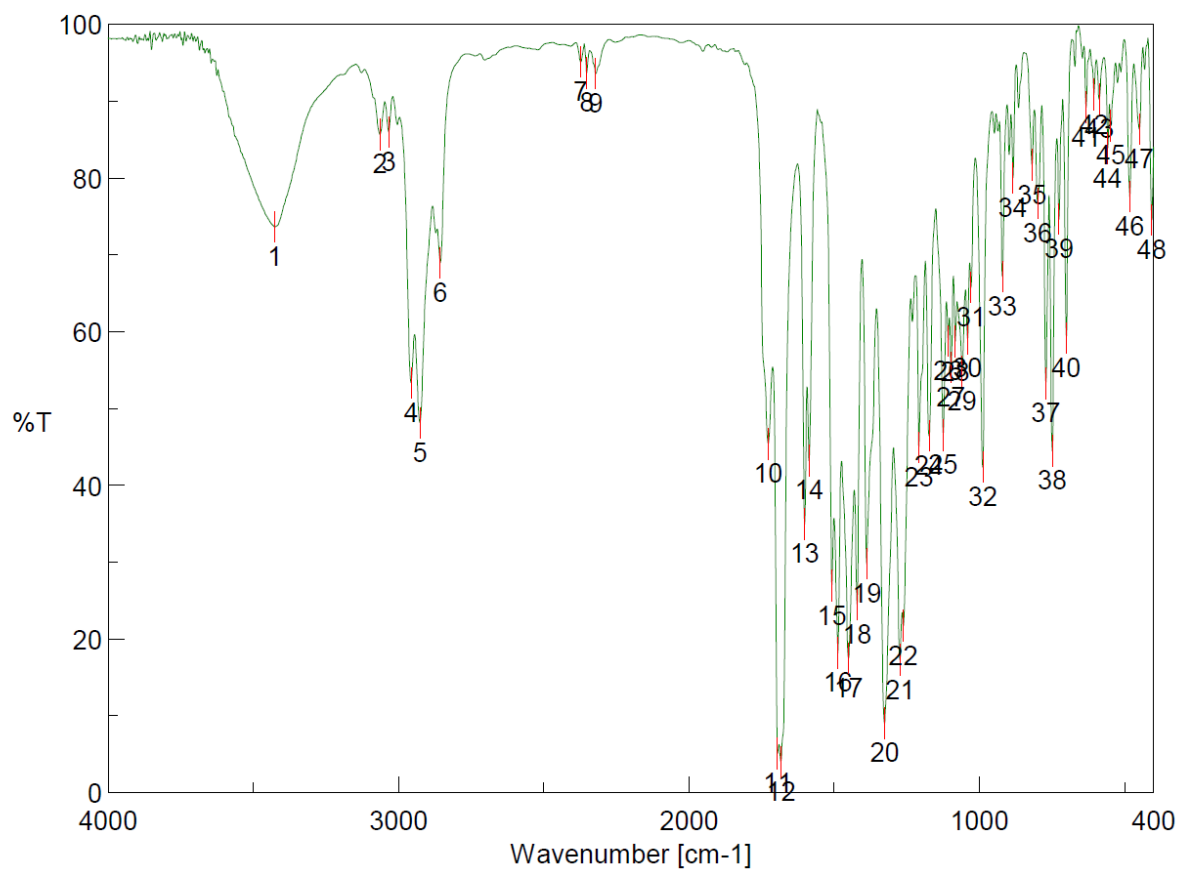

Figure S14. IR spectra of (*rac*)-7a recorded as KBr disc.

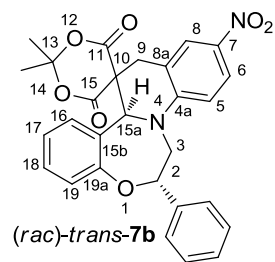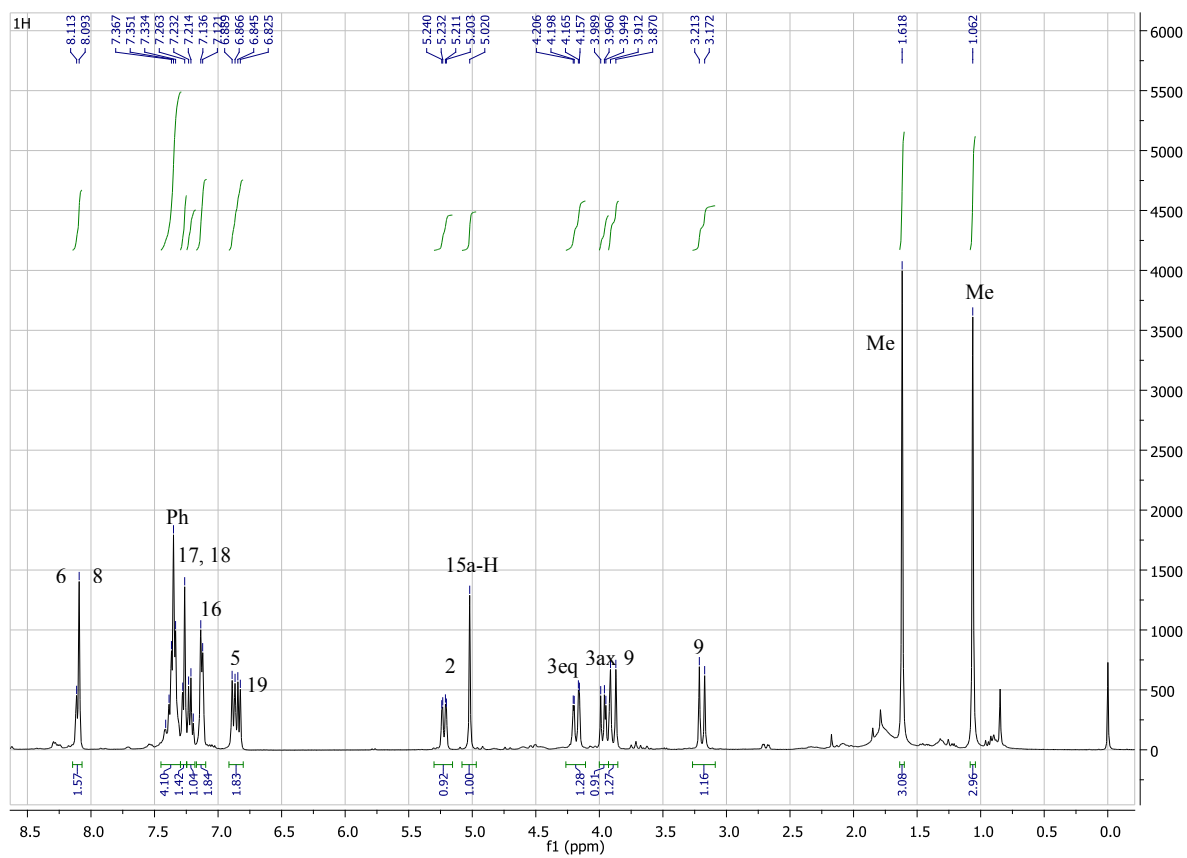

**Figure S15.** <sup>1</sup>H-NMR spectra of (*rac*)-**7b** measured in CDCl<sub>3</sub> (400 MHz).

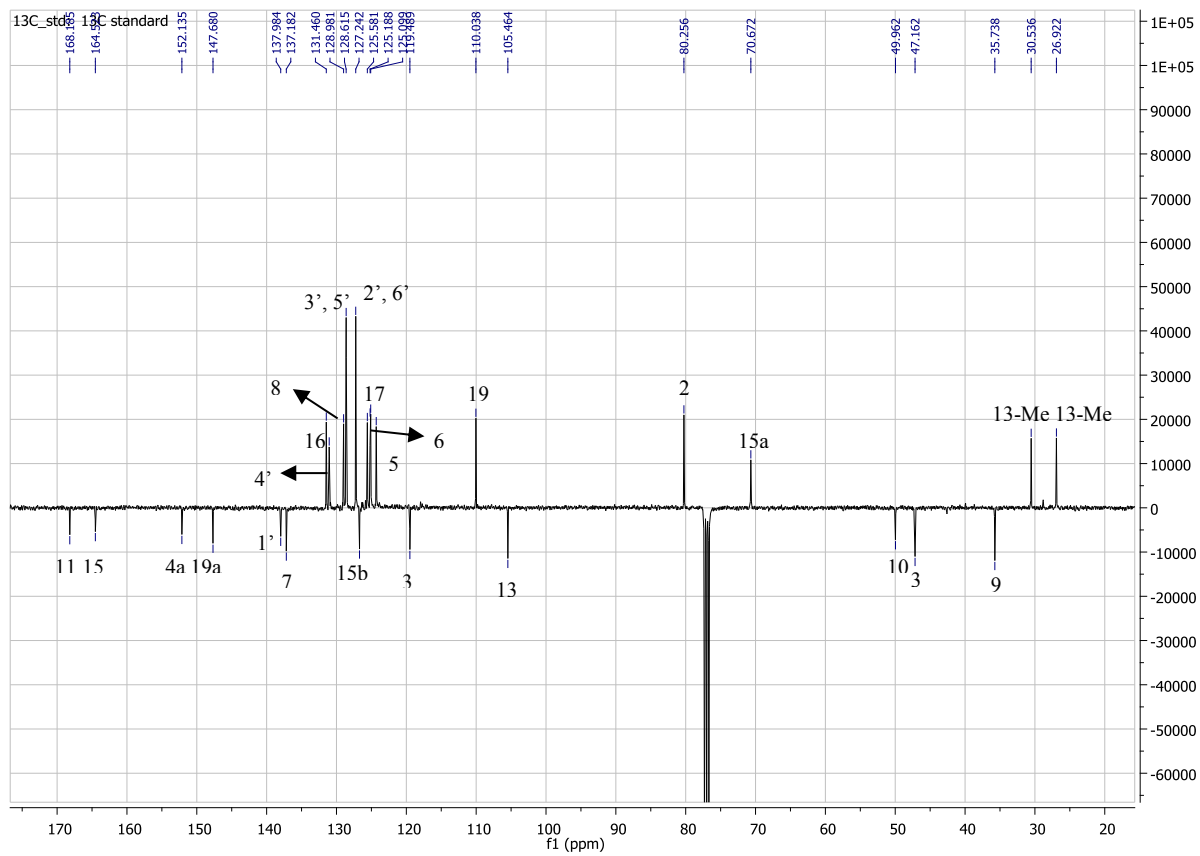

**Figure S16.** <sup>13</sup>C-NMR spectra of *(rac)*-**7b** measured in CDCl<sub>3</sub> (100 MHz).

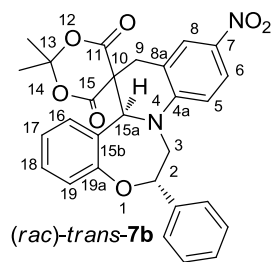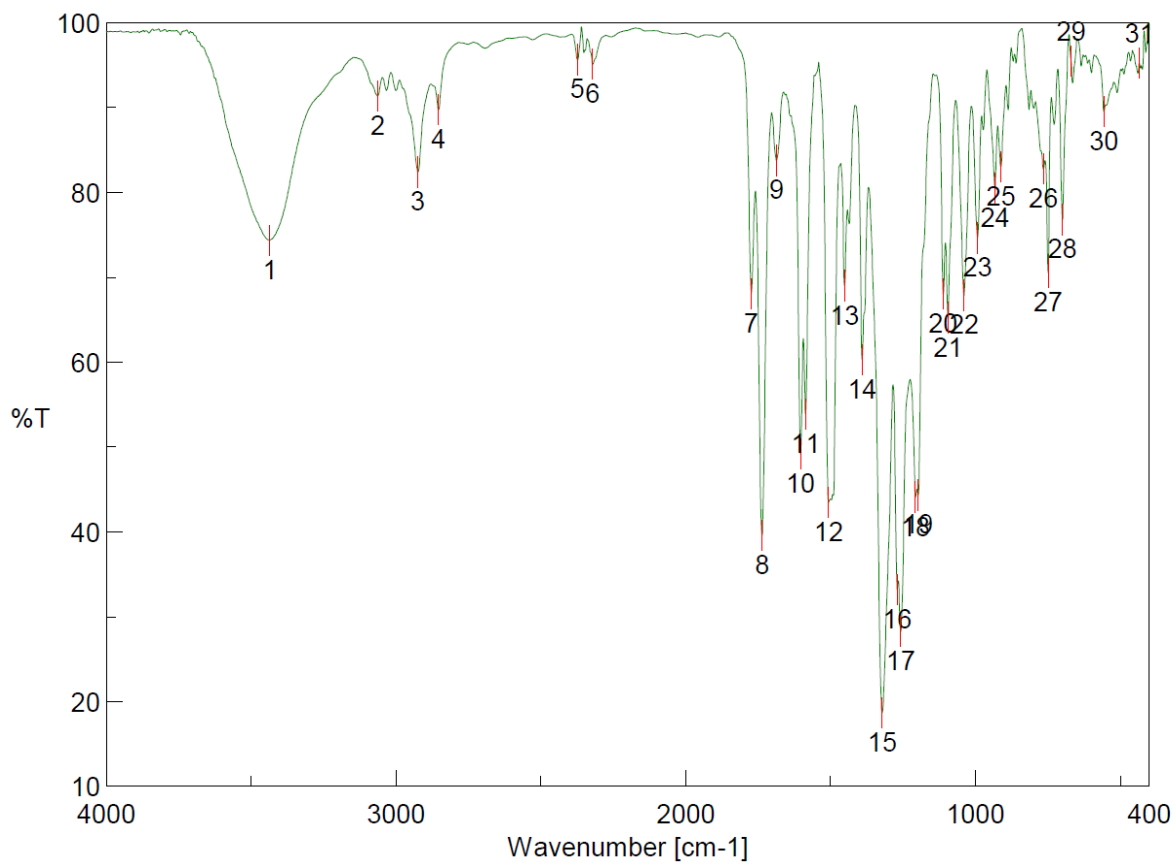

**Figure S17.** IR spectra of *(rac)*-**7b** recorded as KBr disc.



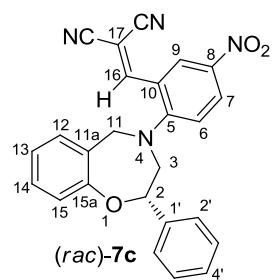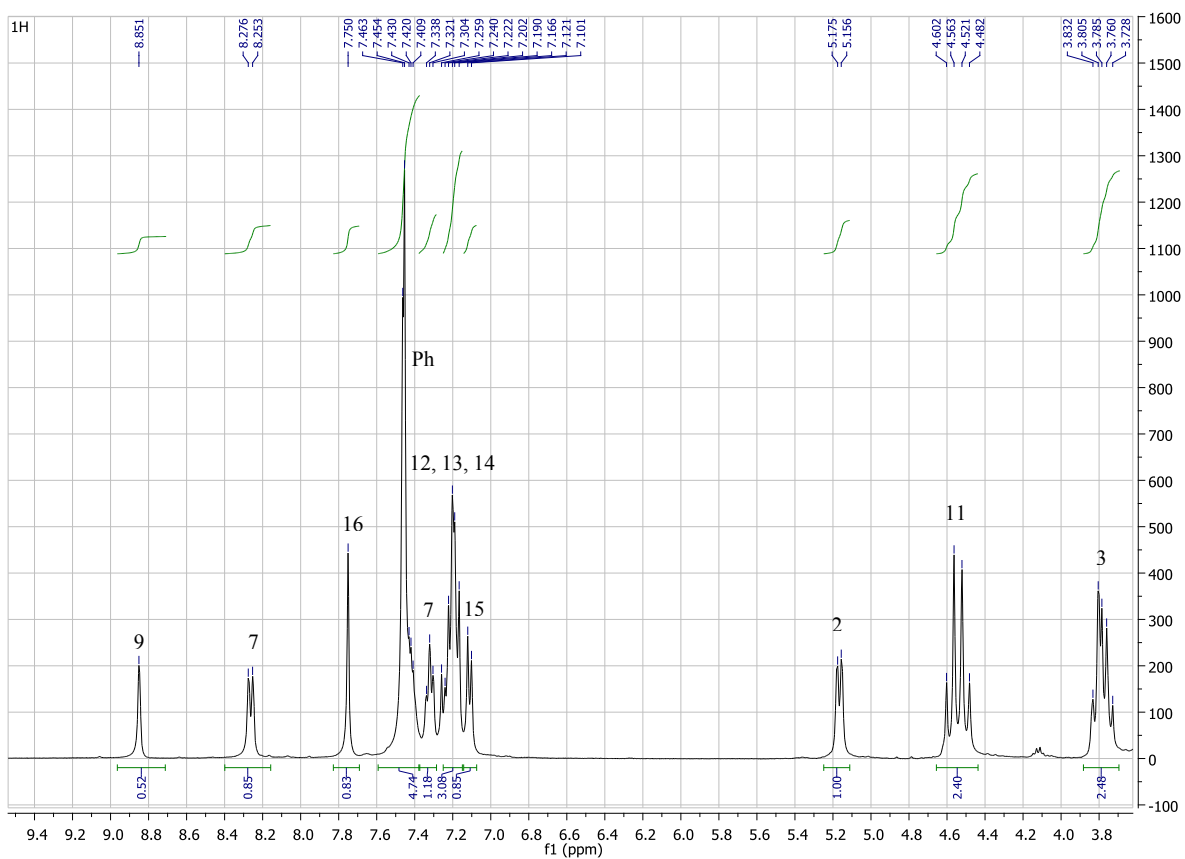

Figure S18.  $^1\text{H-NMR}$  spectra of (*rac*)-**7c** measured in  $\text{CDCl}_3$  400 MHz.

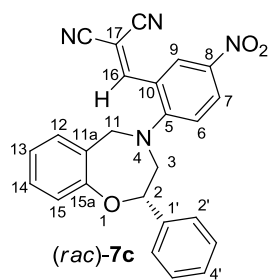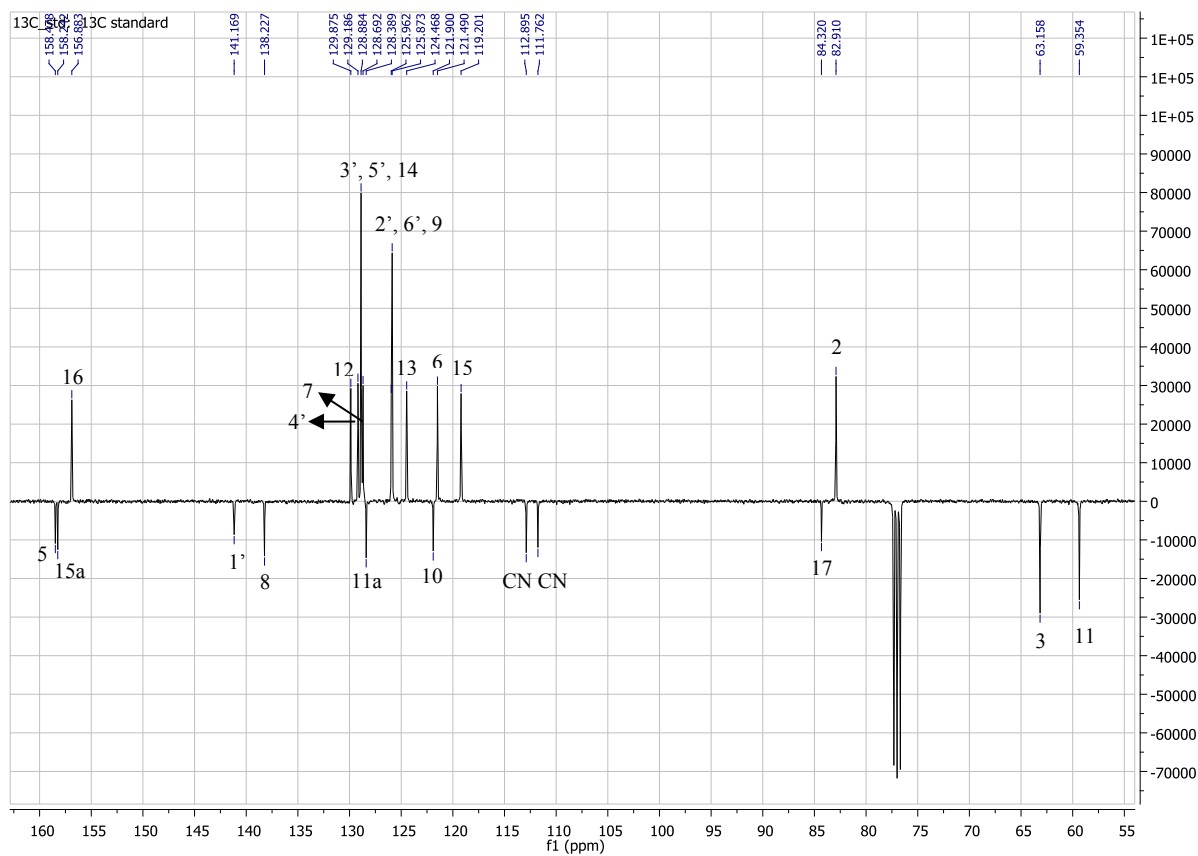

Figure S19. <sup>13</sup>C-NMR spectra of (*rac*)-7c measured in CDCl<sub>3</sub> 100 MHz.

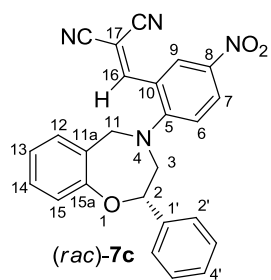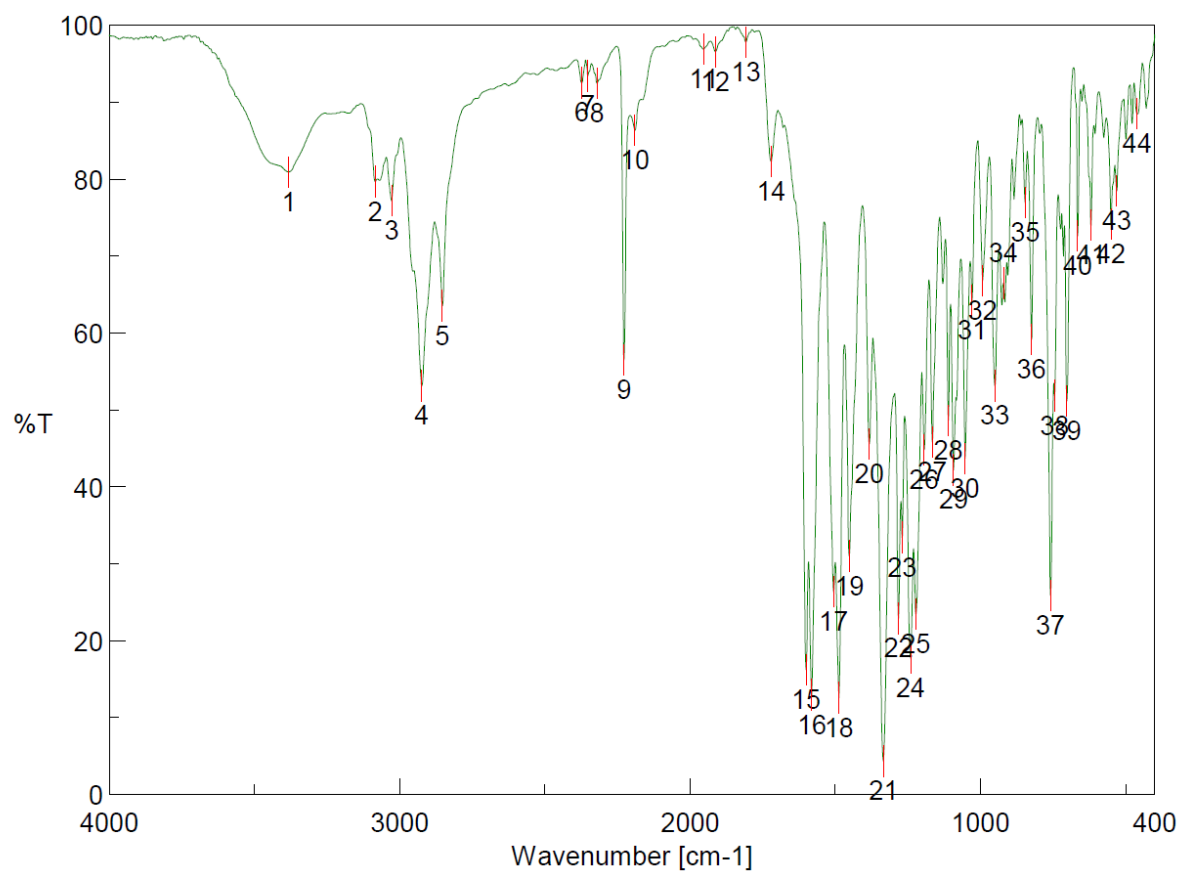

**Figure S20.** IR spectra of (rac)-7c recorded as KBr disc.
